# Supplementary material for: Heat shock protein A2 is a novel extracellular vesicle-associated protein
Source: Springer Nature journal article supplement (doi:10.1038/s41598-023-31962-5), 2023-03-23
Supplement: MOESM1 [file 41598_2023_31962_MOESM1_ESM.pdf]

## **Supplementary Information**

### **Heat Shock Protein A2 is a novel extracellular vesicle-associated protein**

Damian Robert Sojka<sup>1\*</sup>, Agata Abramowicz<sup>1\*</sup>, Małgorzata Adamiec-Organisciok<sup>1,2</sup>, Elżbieta Karnas<sup>3</sup>, Łukasz Mielańczyk<sup>4</sup>, Daria Kania<sup>1</sup>, Sławomir Blamek<sup>1</sup>, Ewa Telka<sup>1</sup>, Dorota Scieglinska<sup>1#</sup>

<sup>1</sup> Maria Skłodowska-Curie National Research Institute of Oncology, Gliwice Branch, Wybrzeże Armii Krajowej 15, 44-102 Gliwice, Poland

<sup>2</sup> Department of Systems Biology and Engineering, Silesian University of Technology, Institute of Automatic Control, Akademicka 16, 44-100 Gliwice, Poland

<sup>3</sup> Faculty of Biochemistry, Biophysics and Biotechnology, Jagiellonian University, Gronostajowa 7 St., 30-387 Krakow, Poland

<sup>4</sup> Department of Histology and Cell Pathology, Faculty of Medical Sciences in Zabrze, Medical University of Silesia, Katowice, Poland

\* These authors contributed equally

### **Corresponding author**

#Dorota Scieglinska, dorota.scieglinska@io.gliwice.pl, tel: (48) 32 27 89 679, fax: (48) 32 231 35 12

**Table S1. List of reference genes used in qPCR analysis.**

| Cell Line | Treatment | Analyzed gene | Reference genes           |
|-----------|-----------|---------------|---------------------------|
| NCI-H1299 | MA        | HSPA2         | <i>B2M, RPL13</i>         |
|           | MA        | HSPA1         | <i>B2M, RPL13, TMEM43</i> |
|           | MG132     | HSPA2         | <i>RPL13, TMEM43</i>      |
|           | MG132     | HSPA1         | <i>RPL13, TMEM43</i>      |
|           | BTZ       | HSPA2         | <i>B2M</i>                |
|           | BTZ       | HSPA1         | <i>RPL13, TMEM43</i>      |
| NCI-H23   | MA        | HSPA2         | <i>RPL13</i>              |
|           | BTZ       | HSPA2         | <i>RPL13, TMEM43</i>      |
| MCF7      | MG132     | HSPA2         | <i>TMPRI, B2M</i>         |

Abbreviations: BTZ, bortezomib; MA, manumycin A; *RPL13*, Ribosomal Protein L13; *B2M*, Beta-2-Microglobulin; *TMEM43*, Transmembrane Protein 43.

**Table S2. List of antibodies used in Western blot and EVs immunocapture analyses.**

|                         | Host/Clonality | Clone       | Catalog Number/ RRID      | Source                                      | Dilution                            |
|-------------------------|----------------|-------------|---------------------------|---------------------------------------------|-------------------------------------|
| <b>Western blot</b>     |                |             |                           |                                             |                                     |
| <b>HSPA1</b>            | Mo/M           | C92F3A-5    | ADI-SPA-810-F/AB_311860   | Enzo, Life Sciences, Famingdale, NY, USA    | 1:5000<br>or 1:3000 for EVs samples |
| <b>HSPA2</b>            | Rb/M           | EPR4596     | Ab108416/AB_10862351      | Abcam, Cambridge, UK                        | 1:5000<br>or 1:3000 for EVs samples |
| <b>HSPA5</b>            | Mo/M           | A-10        | Sc-376768/nd              | Santa Cruz Biotechnology, Inc., Dallas, USA | 1:1000                              |
| <b>HSPA8</b>            | Mo/M           | B-6         | Sc-7298/AB_627761         | Santa Cruz Biotechnology, Inc., Dallas, USA | 1:7500<br>or 1:3000 for EVs samples |
| <b>HSPC</b>             | Mo/M           | AC88        | ADI-SPA-830-F/AB_11181197 | Enzo, Life Sciences, Famingdale, NY, USA    | 1:2000                              |
| <b>p62</b>              | Mo/M           | D-3         | Sc-28359/AB_628279        | Santa Cruz Biotechnology, Inc., Dallas, USA | 1:2000                              |
| <b>β-actin (HRP)</b>    | Mo/M           | AC15        | A3854/AB_262011           | Merck KGaA, Darmstadt, Germany              | 1:20000                             |
| <b>CD63</b>             | Mo/M           | MX-49.129.5 | sc-5275/ AB_627877        | Santa Cruz Biotechnology, Inc., Dallas, USA | 1:1500                              |
| <b>CD63<sup>a</sup></b> | Rb/M           | SY21-02     | MA5-32085/ AB_2809379     | Thermo Fisher Scientific, Waltham, USA      | 1:1000                              |
| <b>CD81</b>             | Mo/M           | 1.3.3.22    | orb388959                 | Biorbyt Ltd.5, Cambridge, United Kingdom    | 1:500                               |
| <b>CD81<sup>a</sup></b> | Rb/M           | D3N2D       | 56039                     | Cell Signaling Technology, Danvers, USA     | 1:800                               |
| <b>CD9</b>              | Mo/M           | C-4         | sc-13118/ AB_627213       | Santa Cruz Biotechnology, Inc., Dallas, USA | 1:800                               |

|                          |      |        |                         |                                                                    |         |
|--------------------------|------|--------|-------------------------|--------------------------------------------------------------------|---------|
| <b>CD9<sup>a</sup></b>   | Rb/M | D8O1A  | 3174/ AB_2798139        | Cell Signaling Technology, Danvers, USA                            | 1:1000  |
| <b>TSG101</b>            | Mo/M | 51     | 612697/ AB_399937       | BD Biosciences, Franklin Lakes, USA                                | 1:1000  |
| <b>TSG101</b>            | Rb/M | JJ0900 | MA5-32463/ AB_2809740   | Thermo Fisher Scientific, Waltham, USA                             | 1:1000  |
| <b>PSMA</b>              | Rb/M | D4S1F  | 12702/ AB_2797998       | Cell Signaling Technology, Danvers, USA                            | 1:1000  |
| <b>GM-130</b>            | Rb/M | D6B1   | 12480/ AB_2797933       | Cell Signaling Technology, Danvers, USA                            | 1:1000  |
| <b>Secondary</b>         |      |        |                         |                                                                    |         |
| <b>Anti-Mo IgG (HRP)</b> | Go   |        | AP124P/AB               | Millipore, Billerica, MA, USA                                      | 1:5000  |
| <b>Anti-Ra IgG (HRP)</b> | Go   |        | AP132P/AB               | Millipore, Billerica, MA, USA                                      | 1:2000  |
| <b>Anti-Mo IgG (HRP)</b> | Go   |        | 31430/AB_228307         | Thermo Fisher Scientific, Waltham, USA                             | 1:10000 |
| <b>Anti-Ra IgG (HRP)</b> | Go   |        | 111-035-003/ AB_2313567 | Jackson ImmunoResearch Laboratories Inc., Ely, Cambridgeshire,, UK | 1:10000 |

#### EVs immunocapture:

|                     | Host/Clonality | Clone   | Catalog Number/ RRID | Source                                                 | Conjugate |
|---------------------|----------------|---------|----------------------|--------------------------------------------------------|-----------|
| <b>CD63</b>         | Mo/M           | C047-1  | MEX002-6/ nd         | Medical & Biological Laboratories (MBL), Nagoya, Japan | Biotin    |
| <b>CD9</b>          | Mo/M           | A100-4  | MEX001-6/ nd         | Medical & Biological Laboratories (MBL), Nagoya, Japan | Biotin    |
| <b>CD81</b>         | Mo/M           | A103-10 | MEX003-6/ nd         | Medical & Biological Laboratories (MBL), Nagoya, Japan | Biotin    |
| <b>PSMA (FOLH1)</b> | Mo/M           | LNI-17  | 342510/ AB_2563243   | BioLegend, San Diego, USA                              | Biotin    |

Abbreviations: RRID, Research Resource Identifier; EVs, Extracellular vesicles; M, monoclonal; Go, goat; Mo, mouse; nd, no data; Rb, Rabbit; HRP, horseradish peroxidase, <sup>a</sup> – antibodies used in Western Blot analysis of proteins in EVs isolated by immunocapture method

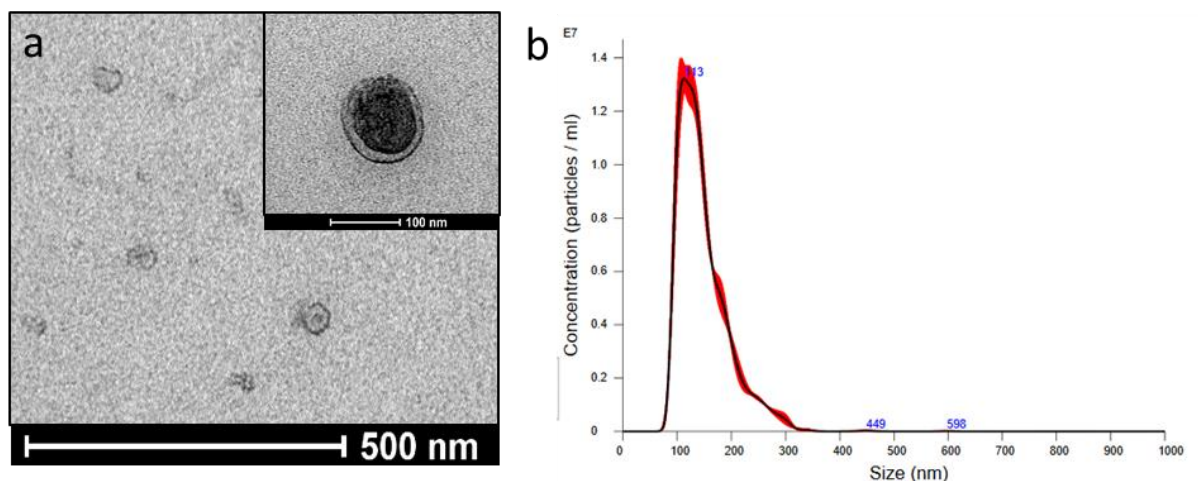

**Figure S1. Characteristic of urinary EVs isolated by size exclusion chromatography.** (a) Representative images from transmission electron microscopy. Two images with different magnifications are shown. Scale bar has been marked under the picture. (b) Representative histogram of particle size distribution of urinary EVs, mode: 112,3 nm.

Directly after size exclusion chromatography suspension containing urinal EVs fraction was mixed with equal volume of 4% PFA and stored at 4°C until analysis in transmission electron microscope (TEM). For TEM analysis 5µl of the mixture was deposited onto a carbon-coated EM grid and incubated for 20 min in a dry environment. Subsequently, the grid has been washed for 2 min in PBS droplet placed on a sheet of Parafilm (Bemis Co. Inc., Neenah, WI). Afterwards, grid was successively transferred to the droplets of 1% glutaraldehyde (5 min,) and distilled water (2 min, 7 times), uranyl-oxalate solution (pH 7; 5 min) and methyl-cellulose-UA (10 min) prepared by mixing a 4% uranyl acetate solution and a 2% methyl-cellulose solution at the ratio of 1:9 (v/v). Finally the air-dried grids were visualized using a Tecnai G2 Spirit BioTWIN (FEI Companye, Hillsboro, OR) at 120-kV acceleration.

Fig. 1A

MG132

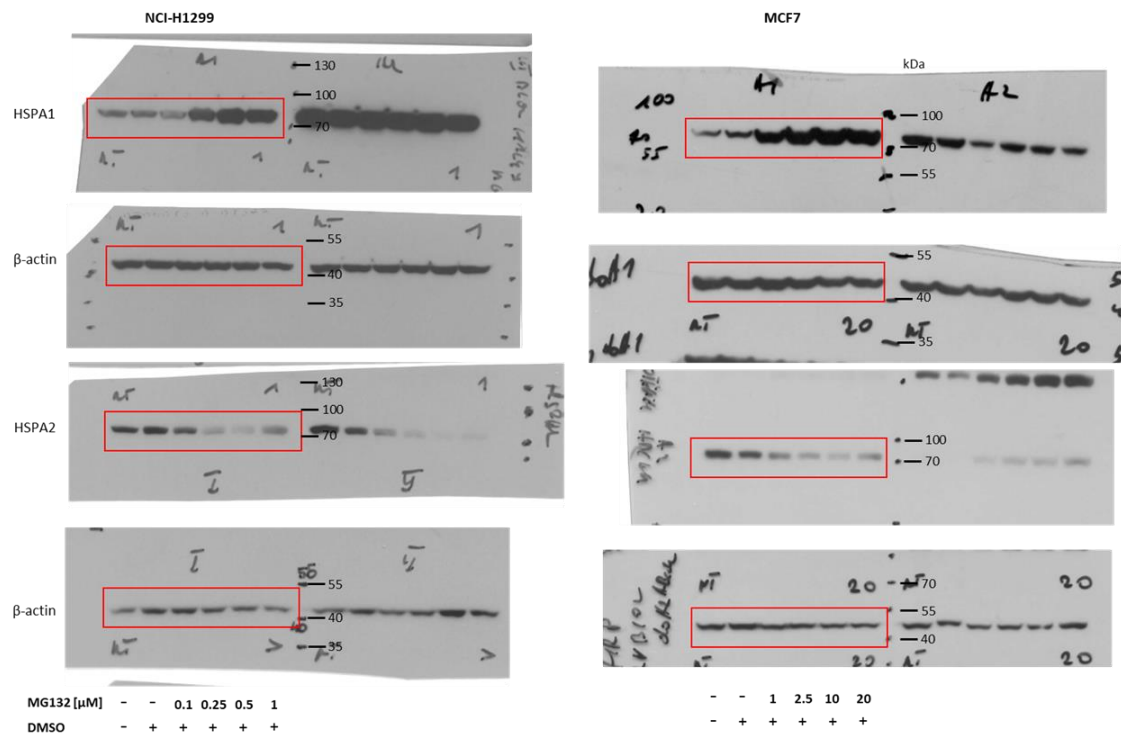

Fig. 1B

Bortezomib

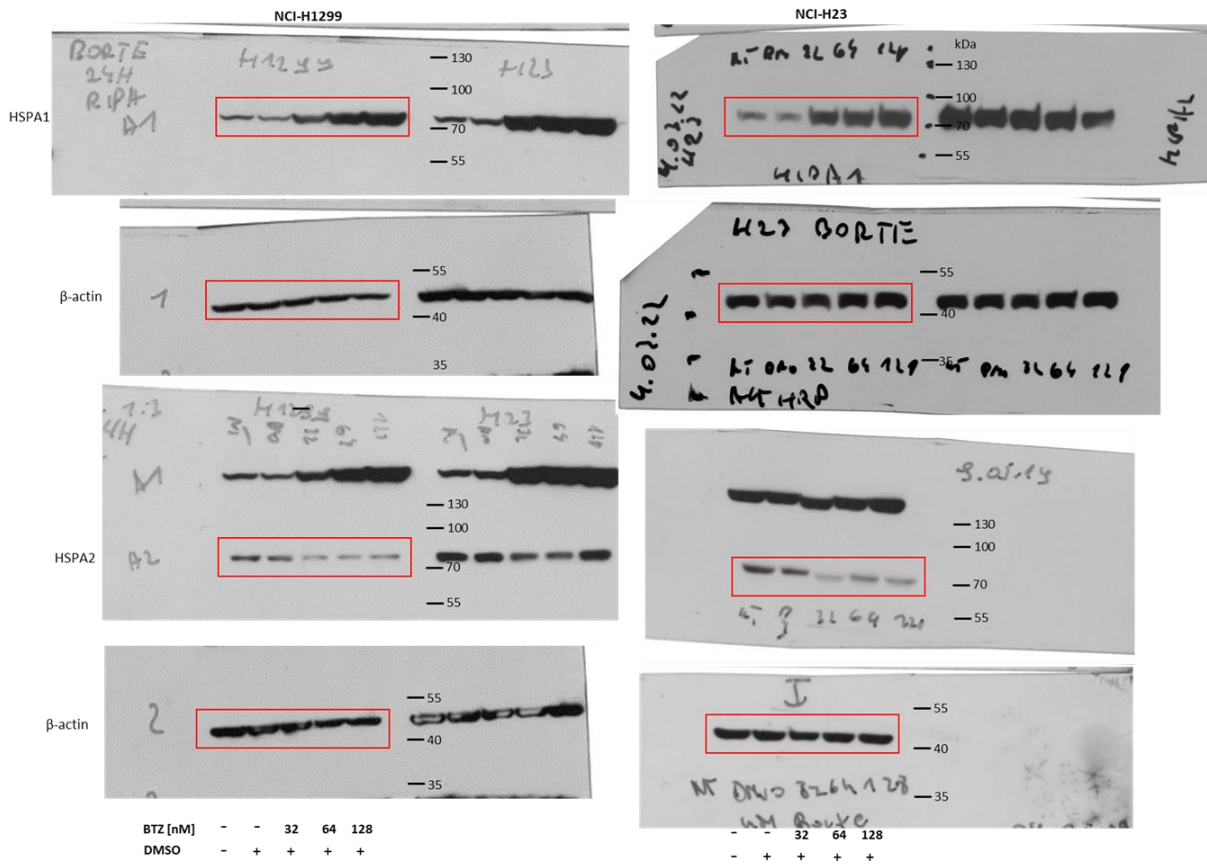

Fig. 1C

Manumycin A

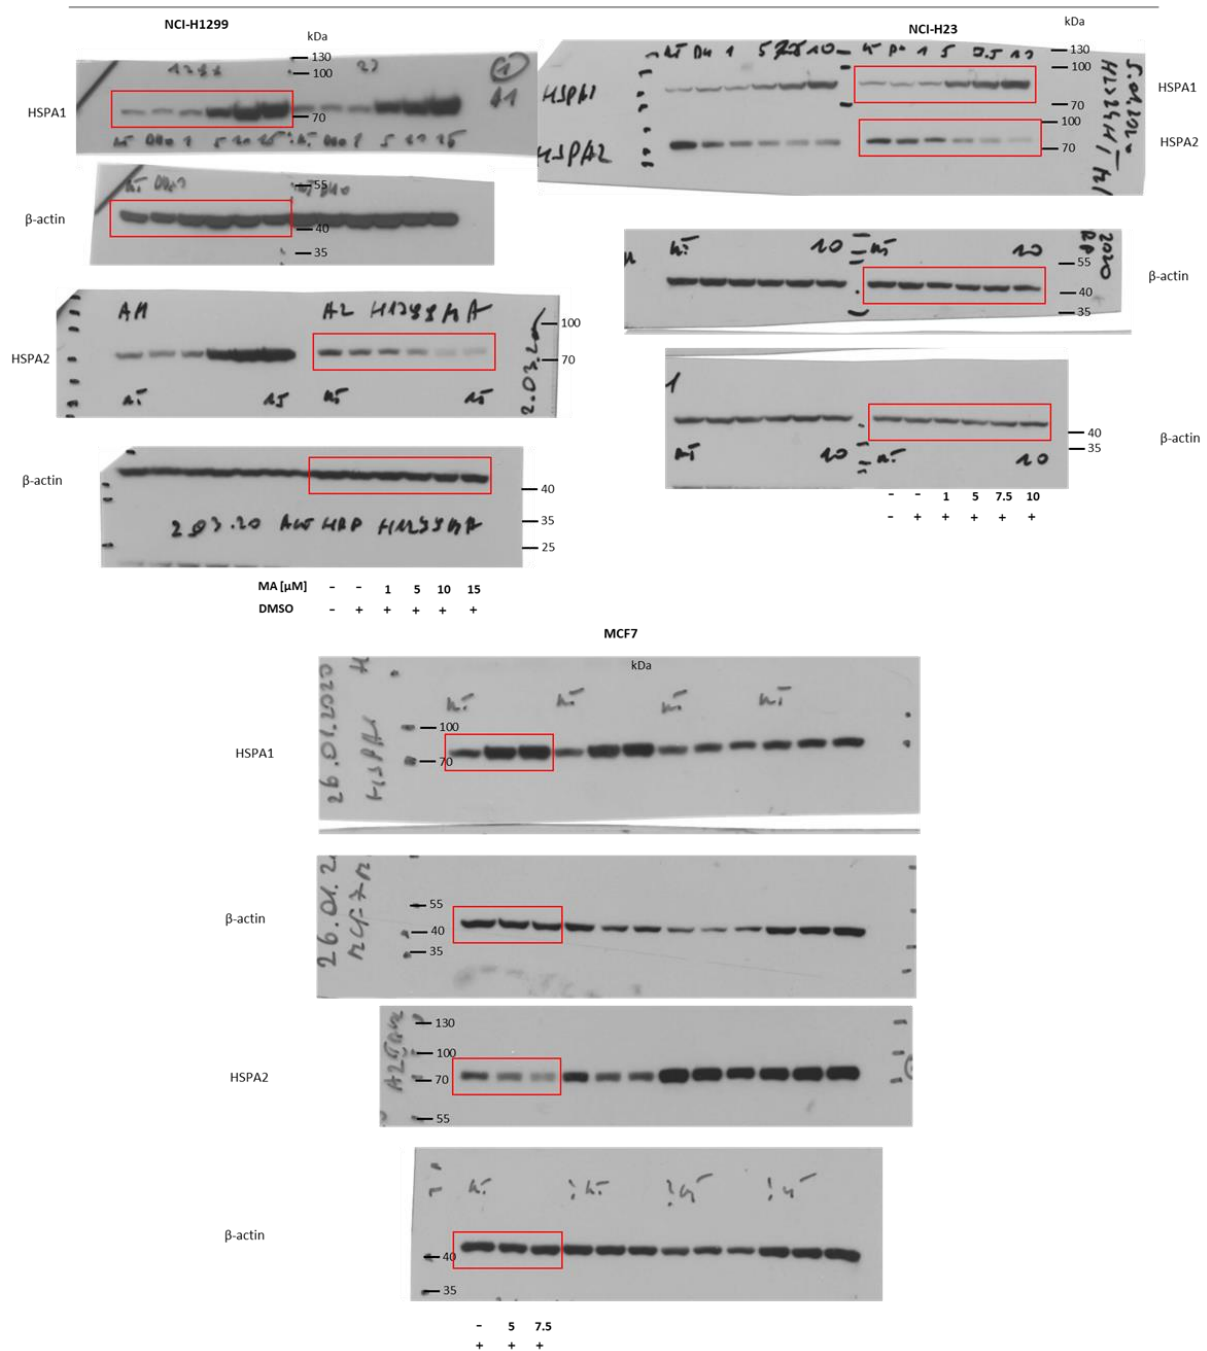

**Figure S2. Unprocessed original scans of autoradiograms (immunoblots) included in Fig. 1 A-C.** After protein transfer, membranes were cut according to 55 kDa molecular ladder band and fragments were incubated with appropriate primary antibodies. X-ray film was used for detection of chemiluminescent signal (the membrane edges are not visible on developed film due to detection of strong and specific signal). Red lines identify cropped areas.

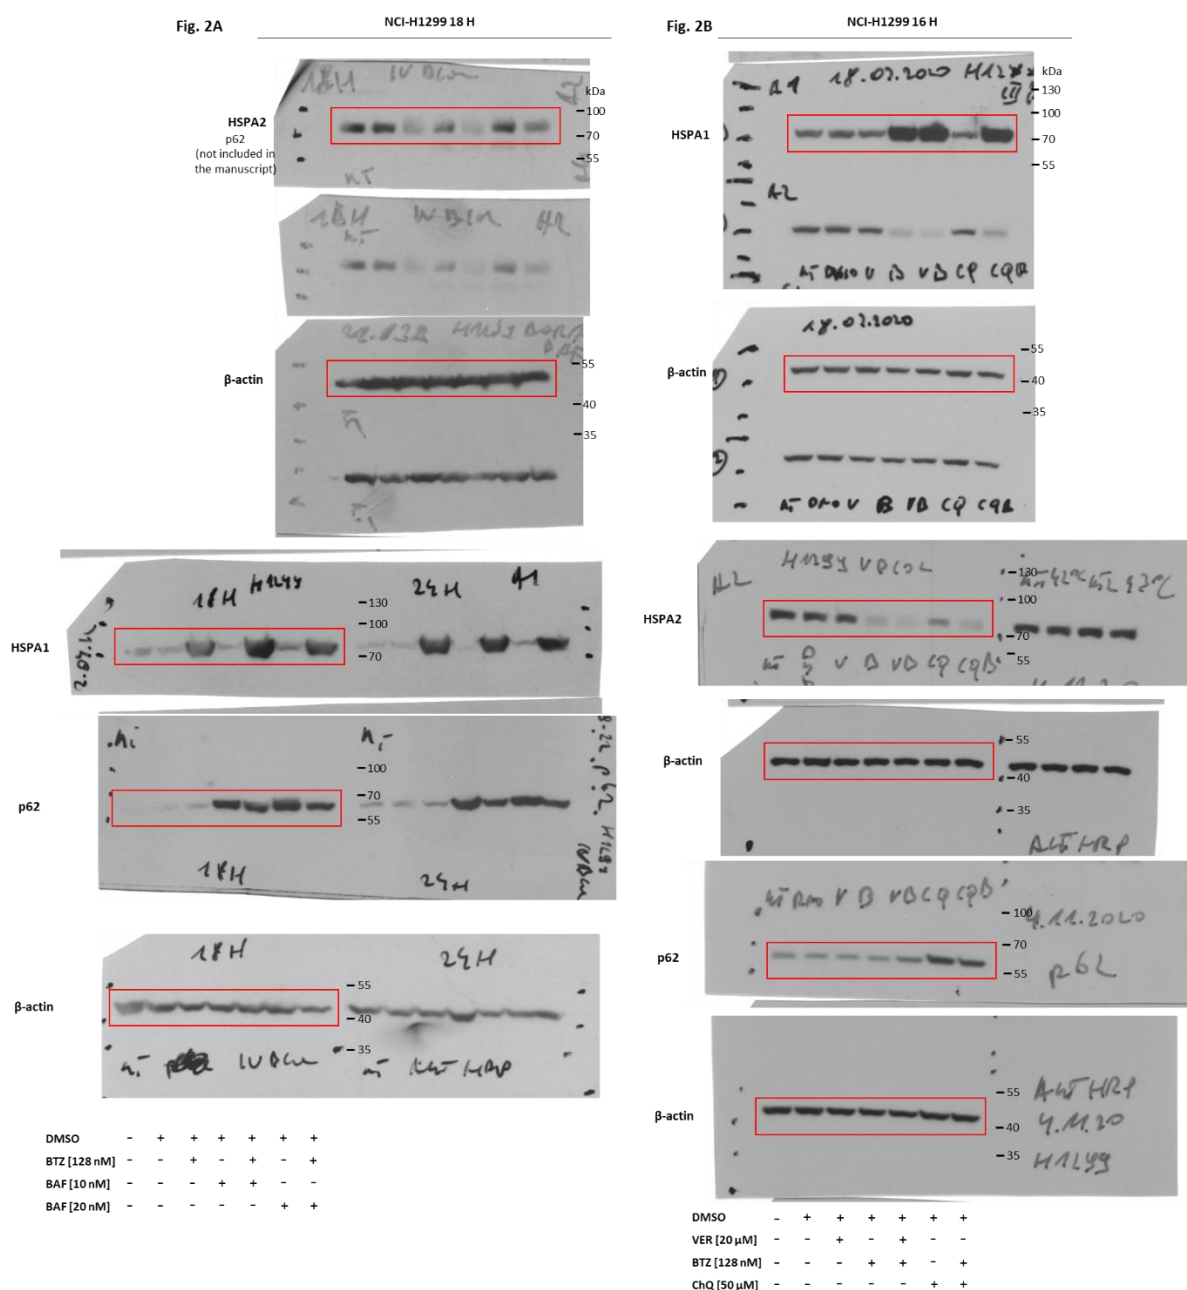

**Figure S3. Unprocessed original scans of autoradiograms (immunoblots) included in Fig. 2 A and 2 B.** After protein transfer, membranes were cut according to the 55 kDa molecular ladder band and each fragment was incubated with primary antibody. Chemiluminescent signal was detected using X-ray film (the membrane edges are not visible on developed film due to detection of strong and specific signal). Red lines identify cropped areas. In Fig. 2A the same membrane was used for HSPA1 and p62 detection after antibodies stripping in Restore Western Blot Stripping Buffer (Thermo Fisher Scientific, Waltham, MA, USA).

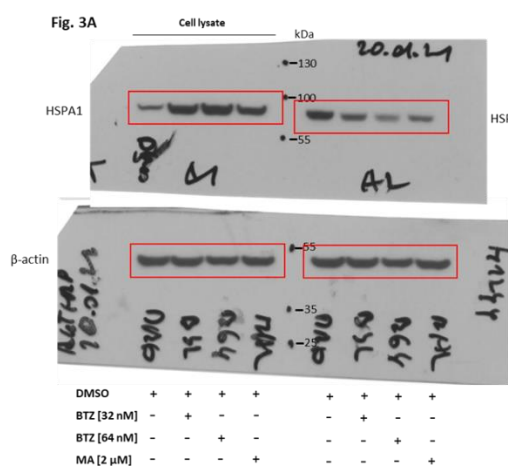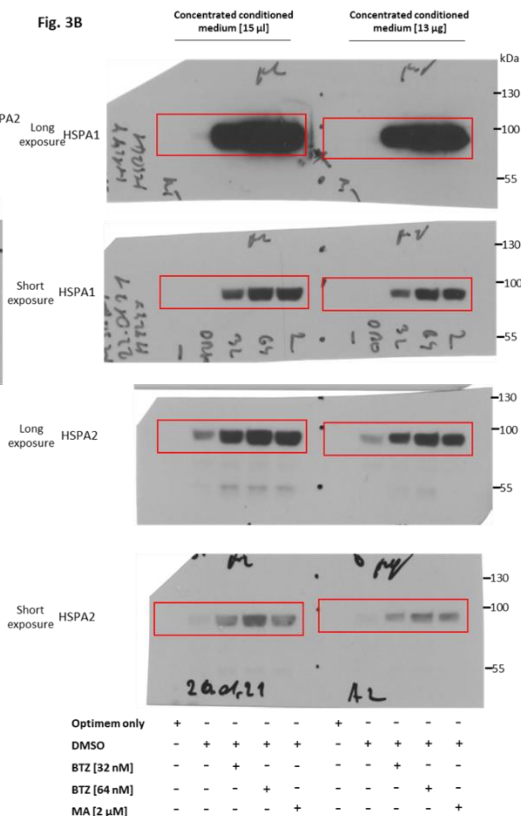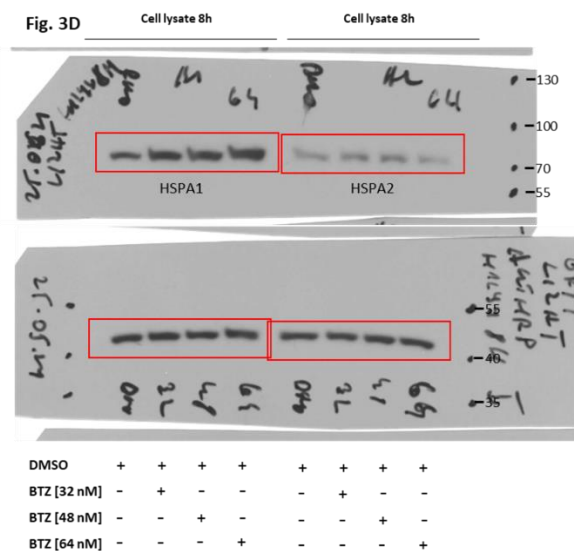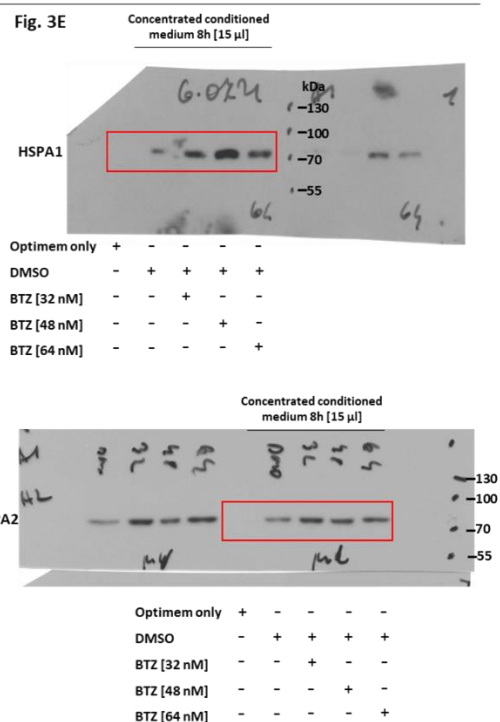

**Figure S4. Unprocessed original scans of autoradiograms (immunoblots) included in Fig. 3 A-B and Fig. 3 D-E.** After protein transfer, membranes were cut according to the 55 kDa molecular ladder band and were incubated with primary antibodies. Chemiluminescent signal was detected using X-ray film (blot edges are not visible on developed film due to detection of strong and specific signal). Red lines identify cropped areas.



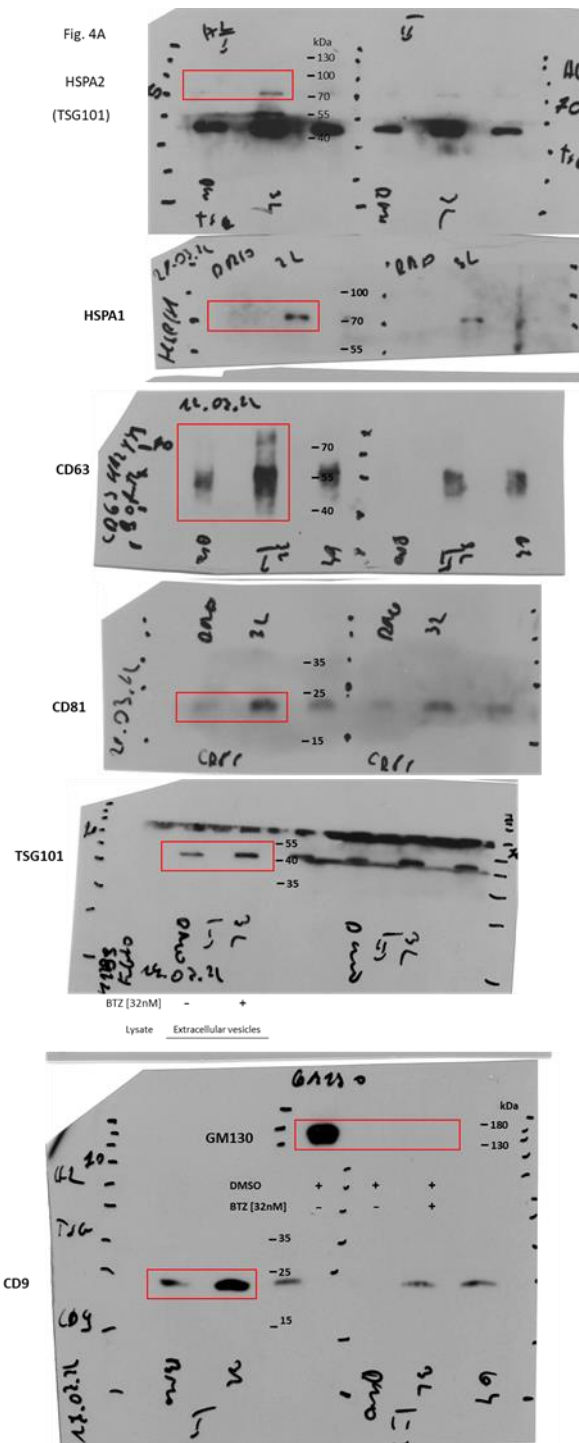

**Figure S5. Unprocessed original scans of autoradiograms (immunoblots) included in Fig. 4 A.** After protein transfer, membranes were cut according to the proteins' molecular weight and each fragment was incubated with appropriate primary antibody. X-ray film was used for chemiluminescent signal detection (blot edges are not visible on developed film). Red lines identify cropped areas.

HSPA2-knockout in NCI-H1299 cells

Fig. 5A

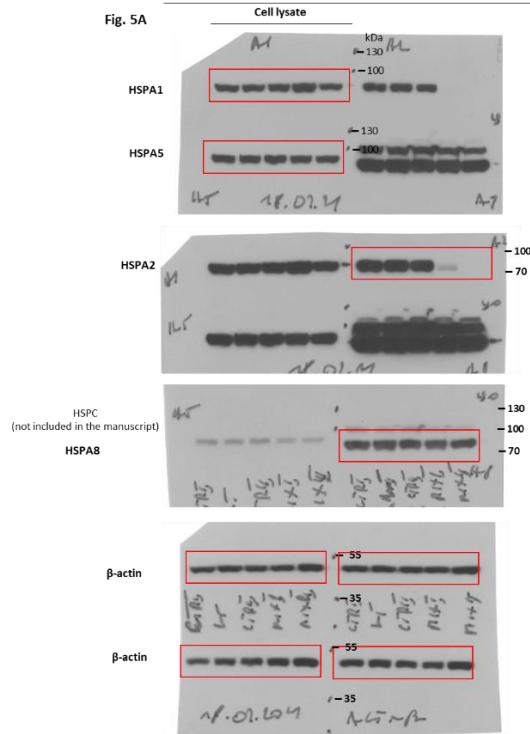

Fig. 5B

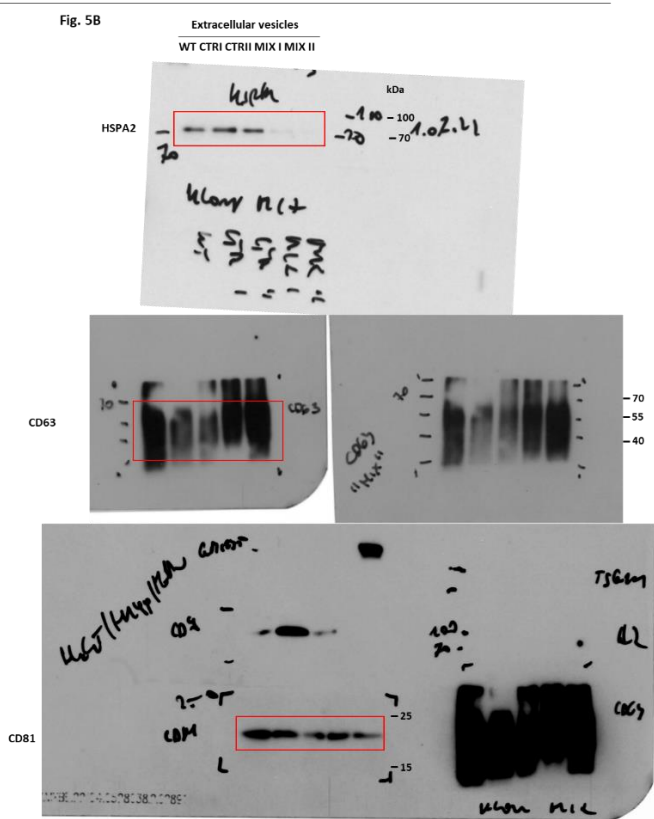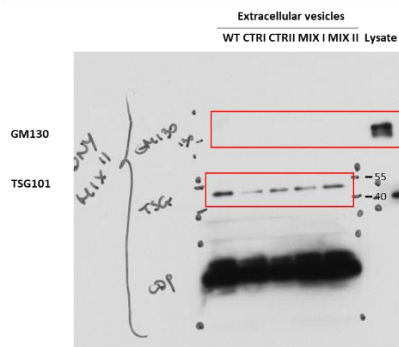

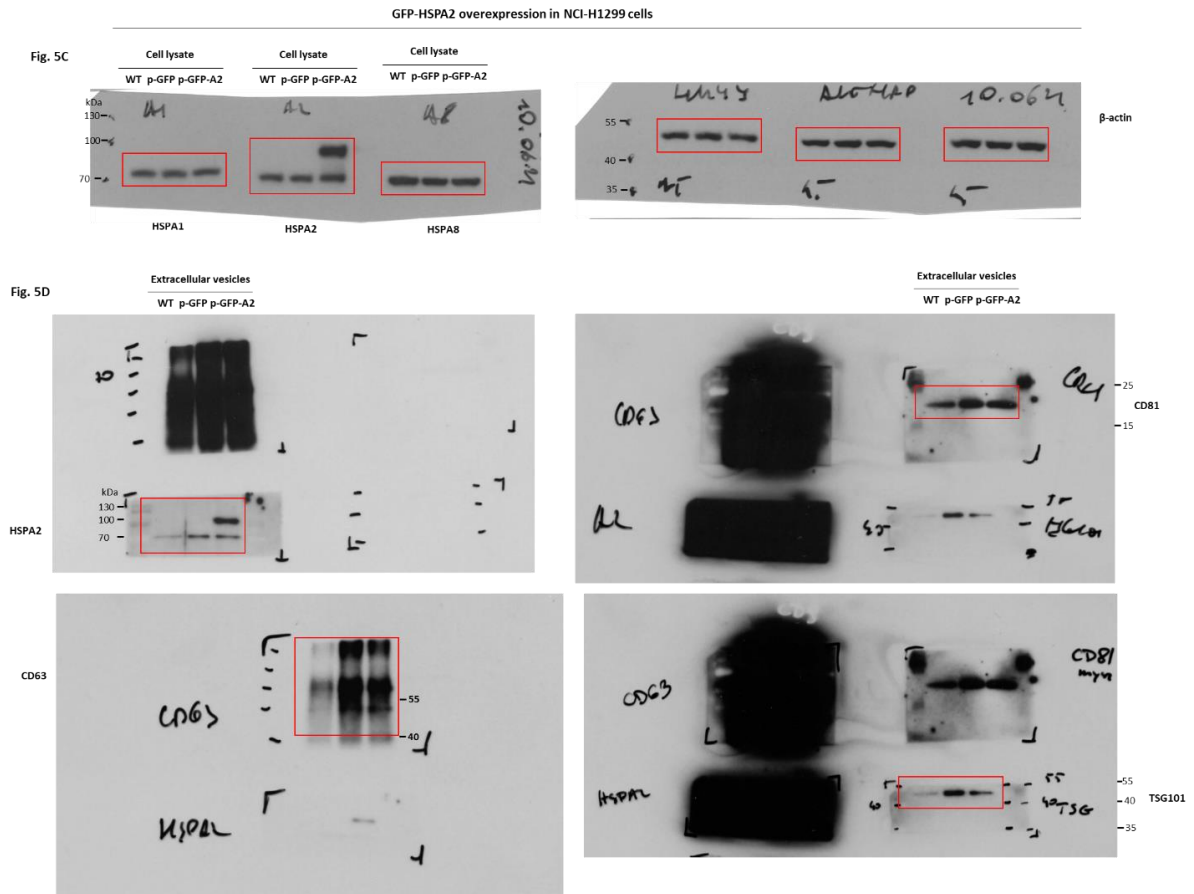

**Figure S6. Unprocessed original scans of autoradiograms (immunoblots) included in Fig. 5 A-5D.** After protein transfer, membranes were cut into two (or three) fragments according to the proteins' molecular weight and each fragment was incubated with primary antibody. For chemiluminescent signal detection X-ray film was used. Red lines identify cropped areas.

### Extracellular vesicles

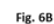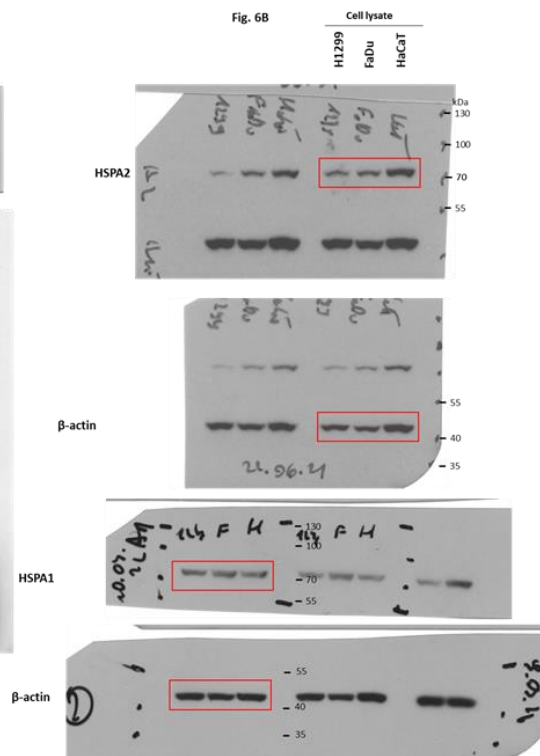

**Fig. 6C**

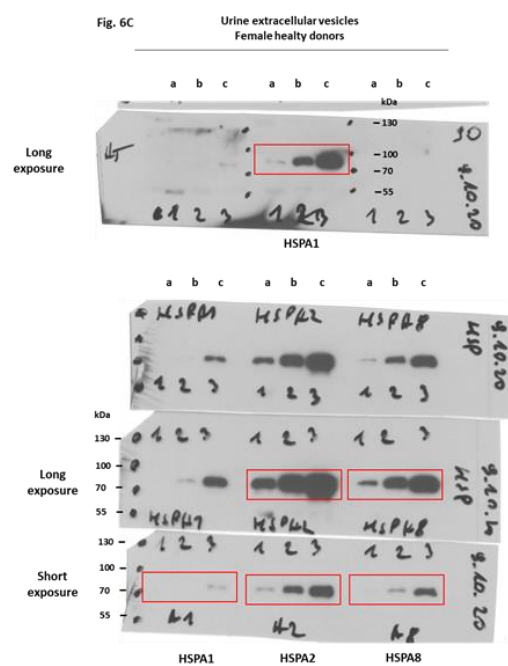

Fig. 6D

Urine extracellular vesicles

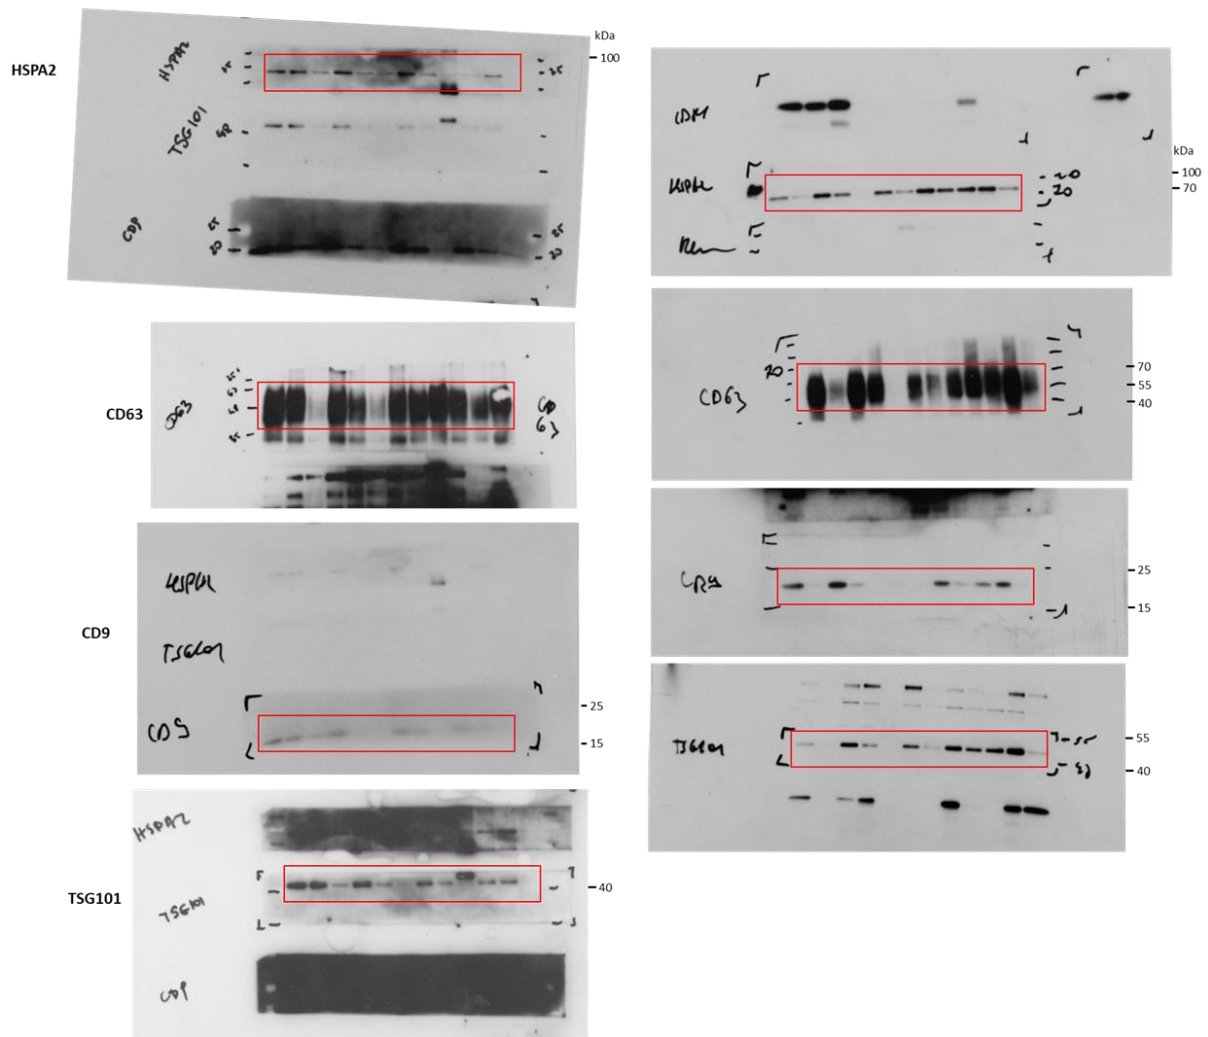

**Figure S7. Unprocessed original scans of autoradiograms (immunoblots) included in Fig. 6 A-D.** After protein transfer, membranes were cut into two (or more) fragments according to the proteins' molecular weight and each fragment was incubated with primary antibody. For chemiluminescent signal detection X-ray film was used. Red lines identify cropped areas.

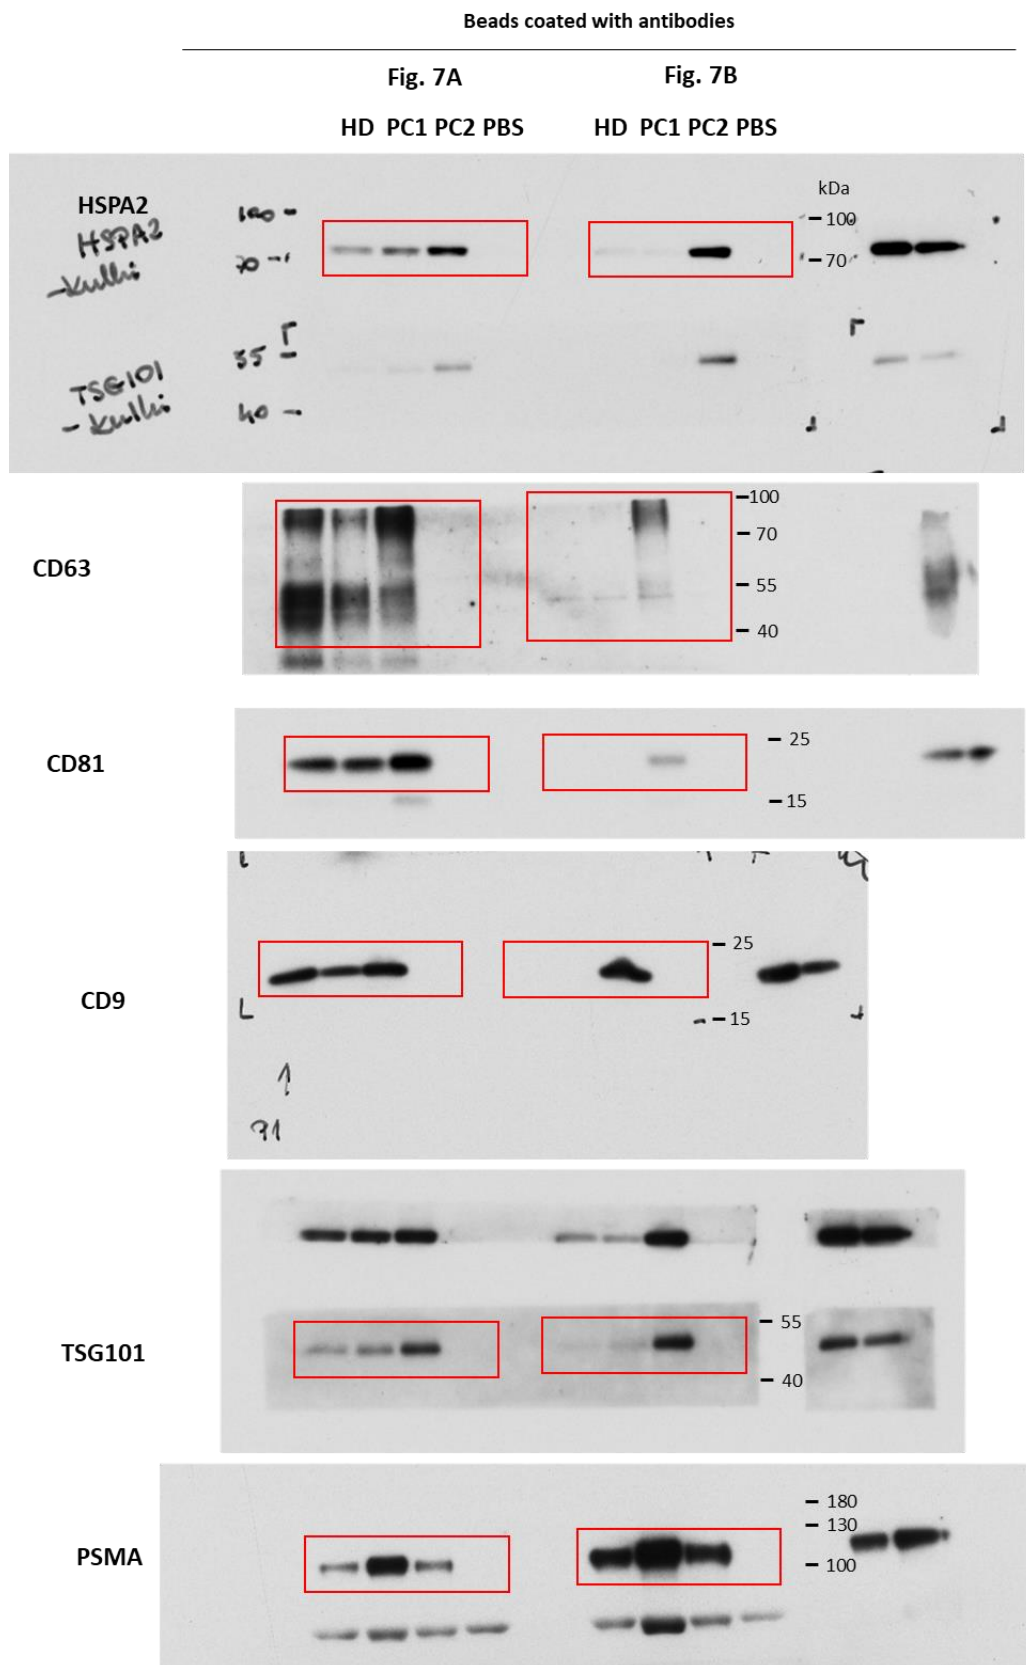

**Figure S8. Unprocessed original scans of autoradiograms (immunoblots) included in Fig. 7 A. and 7 B.** After protein transfer, were cut into two or more fragments according to the proteins' molecular weight. Each fragment was incubated with primary antibody. X-ray film was used for chemiluminescent signal detection. Red lines identify cropped areas.
